# Supplementary material for: Gelatin assisted wet chemistry synthesis of high quality β-FeOOH nanorods anchored on graphene nanosheets with superior lithium-ion battery application
Source: Royal Society of Chemistry journal article supplement (doi:10.1039/c5ra28170a), 2016-01-01
Supplement: c5ra28170a1.pdf [file c5ra28170a1.pdf]

# Gelatin Assisted Wet Chemistry Synthesis of High Quality $\beta$ -FeOOH Nanorods Anchored on Graphene Nanosheets with Superior Lithium-ion Battery Application†

Xinyu Zhang and Yaping Du\*

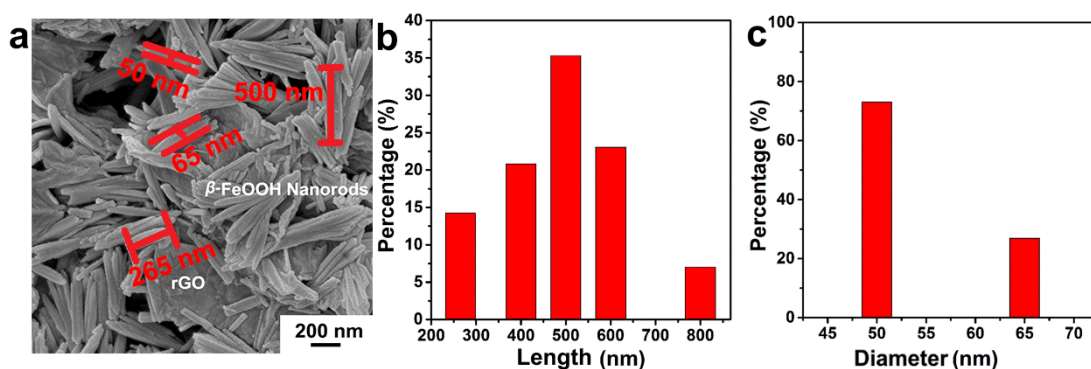

Fig. S1 (a) SEM image of the  $\beta$ -FeOOH nanorods; (b) Length and (c) Diameter distribution histogram of the  $\beta$ -FeOOH nanorods.

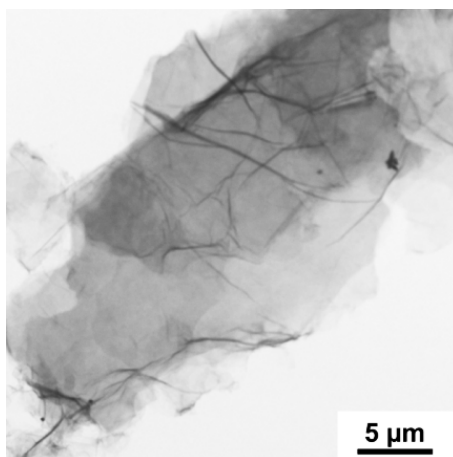

Fig. S2 TEM image of pure graphene oxides (GO).

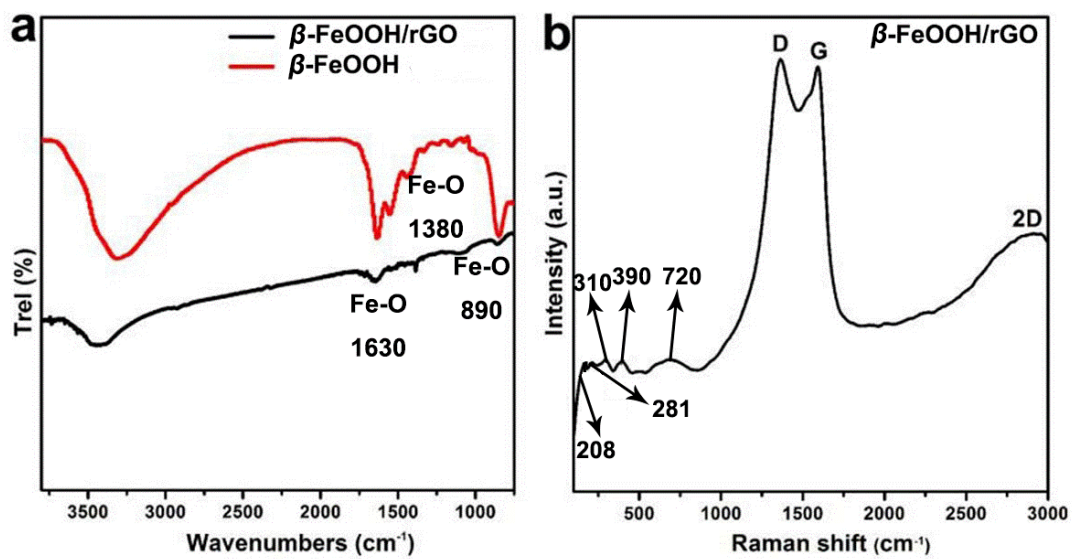

**Fig. S3** (a) FTIR and (b) Raman spectra of  $\beta$ -FeOOH nanorods and  $\beta$ -FeOOH/rGO hybrid nanostructures.

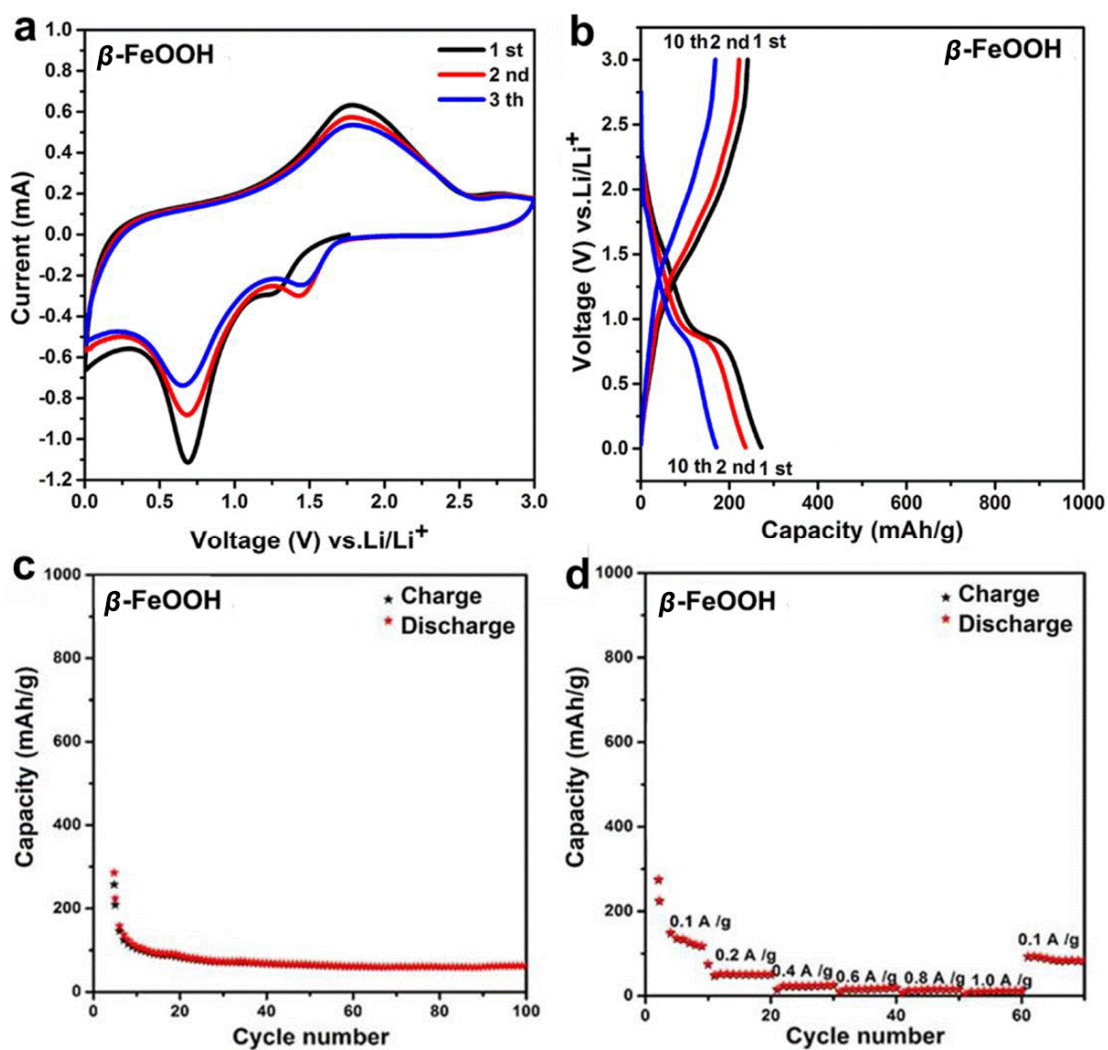

**Fig. S4** Electrochemical performance of pure  $\beta$ -FeOOH nanorods for lithium ion battery application. (a) CV curves at a scan rate of  $0.50 \text{ mV/s}$ ; (b) Charge/discharge curves cycling at a current density of  $0.10 \text{ A/g}$ ; (c) Cycling performance at a current density of  $0.10 \text{ A/g}$ ; (d) Rate ability at different current densities.

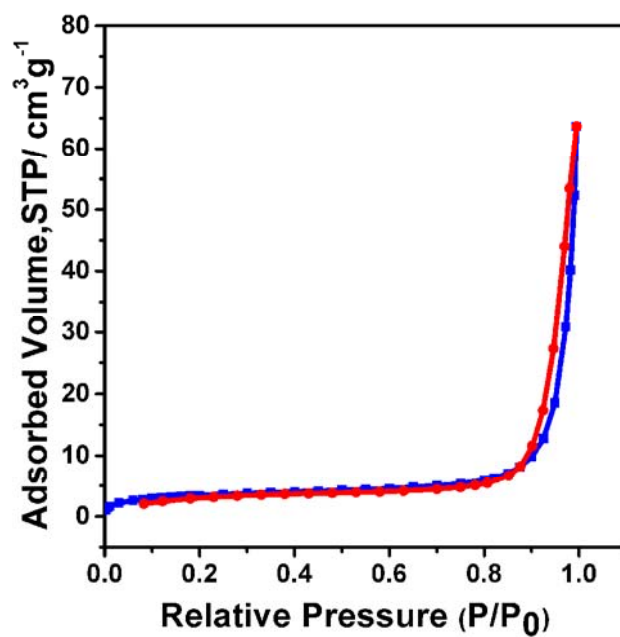

**Fig. S5** Nitrogen adsorption-desorption isotherm for  $\beta$ -FeOOH/rGO hybrid nanostructures. The surface area for  $\beta$ -FeOOH/rGO is calculated to  $\sim 88.48 \text{ m}^2/\text{g}$ .

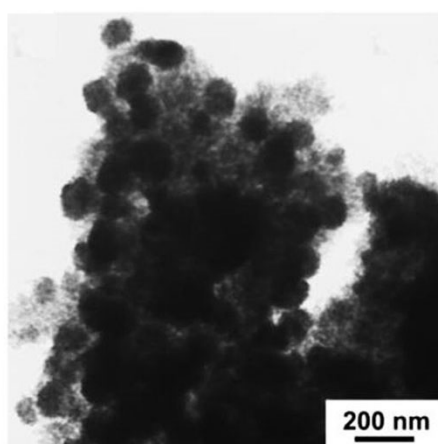

**Fig. S6** TEM image of the  $\beta$ -FeOOH/rGO sample after 100 cycles at 0.1 A/g.
